# Supplementary material for: Screening of FDA-Approved Drugs Using a MERS-CoV Clinical Isolate from South Korea Identifies Potential Therapeutic Options for COVID-19
Source: Viruses. 2021 Apr 9;13(4):651. doi: 10.3390/v13040651 (PMC8069929; doi:10.3390/v13040651)
Supplement: Supplementary file 1 [file viruses-13-00651-s001.pdf]

# Screening of FDA-Approved Drugs Using a MERS-CoV Clinical Isolate from South Korea Identifies Potential Therapeutic Options for COVID-19

Meehyun Ko <sup>1,†</sup>, So Young Chang <sup>1,†</sup>, Soo Young Byun <sup>2</sup>, Aleksandr Ianevski <sup>3</sup>, Inhee Choi <sup>4</sup>, Anne-Laure Pham Hung d'Alexandry d'Orengiani <sup>1</sup>, Erlend Ravlo <sup>3</sup>, Wei Wang <sup>3</sup>, Magnar Bjørås <sup>3</sup>, Denis E. Kainov <sup>3,5,6</sup>, David Shum <sup>2</sup>, Ji-Young Min <sup>1,‡,\*</sup> and Marc P. Windisch <sup>7,8,\*</sup>

## Supplementary Material and Methods

### 1.1. Reagents

Chloroquine diphosphate (CQ; C6628), chlorpromazine hydrochloride (CPZ; C8138), and cyclosporine A (CsA; C1832) were purchased from Sigma-Aldrich (St. Louis, MO, USA). Lopinavir (LPV; S1380) was purchased from SelleckChem (Houston, TX, USA). Chloroquine was dissolved in Dulbecco's phosphate-buffered saline (DPBS; Welgene, Gyeongsan, Republic of Korea), and other reagents were dissolved in DMSO for the screening. Anti-MERS-CoV S antibody was purchased from Sino Biological Inc. (Beijing, China). Alexa Fluor 488 goat anti-rabbit IgG (H+L) secondary antibody and Hoechst 33342 were purchased from Molecular Probes/Thermo Fisher Scientific. Paraformaldehyde (PFA) (32% aqueous solution) and normal goat serum were purchased from Electron Microscopy Sciences (Hatfield, PA, USA) and Vector Laboratories, Inc. (Burlingame, CA, USA), respectively.

### 1.2. Time-of-Addition Assays

Twelve FDA-approved drugs were selected after DRC analysis for time-of-addition assays to characterize the mechanism of action. Briefly, Vero cells were seeded at  $1.2 \times 10^4$  cells per well in Opti-PRO™ SFM supplemented with 4 mM L-glutamine and 1× antibiotic-antimycotic solution in black, 96-well, µClear plates (Greiner Bio-One; Kremsmünster, Austria) at 24 h prior to the experiment. Subsequently, cells were infected with MERS-CoV/KOR/2015 at an MOI of 5 at 4 °C for 1 h to synchronize the infection, followed by three washes with Dulbecco's phosphate-buffered saline (DPBS), and transferred to a 37°C incubator. Drugs were added to cells at various time points pre- or post-infection; 1 h prior to or at 0, 1, 2, 3, or 4 hpi. Drugs were added to infected cells at a concentration of 1, 5, or 10 µM depending on the IC<sub>90</sub> value of the compound. Chloroquine, which was used as an early-stage inhibitor control, was used at a concentration of 100 µM. Cells were fixed with 4% PFA at 6 hpi. IFA and image analyses were performed as described.

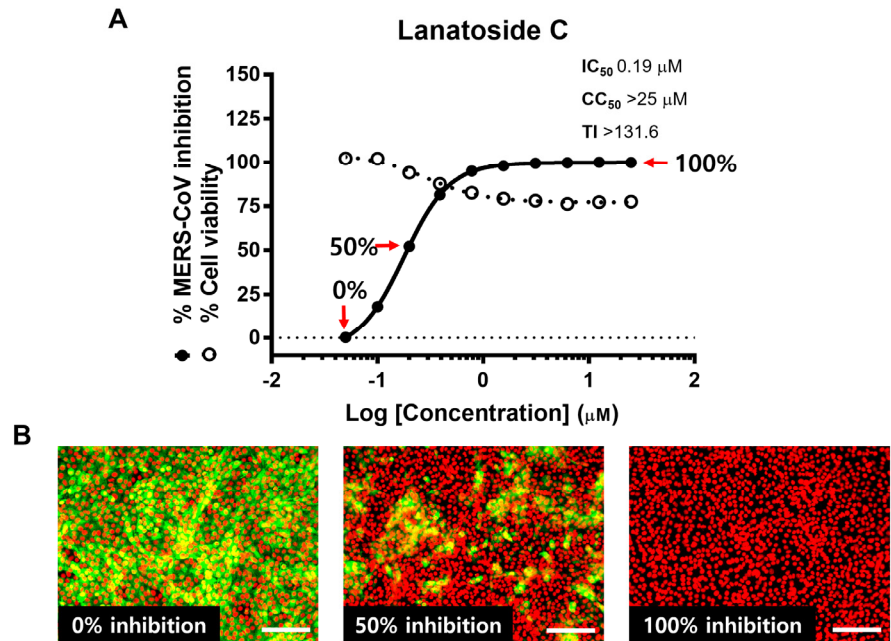

**Figure S1.** Example images of MERS-CoV inhibition in Vero cells. **(A)** A representative dose-response curve (DRC) for lanatoside C inhibition of MERS-CoV in Vero cells. **(B)** HCS was performed using an image-based assay, and compound efficacy was measured by inhibition of MERS-CoV S protein expression. Images depict 0%, 50%, and 100% inhibition, as indicated in the DRC. Scale bars, 100  $\mu$ m.

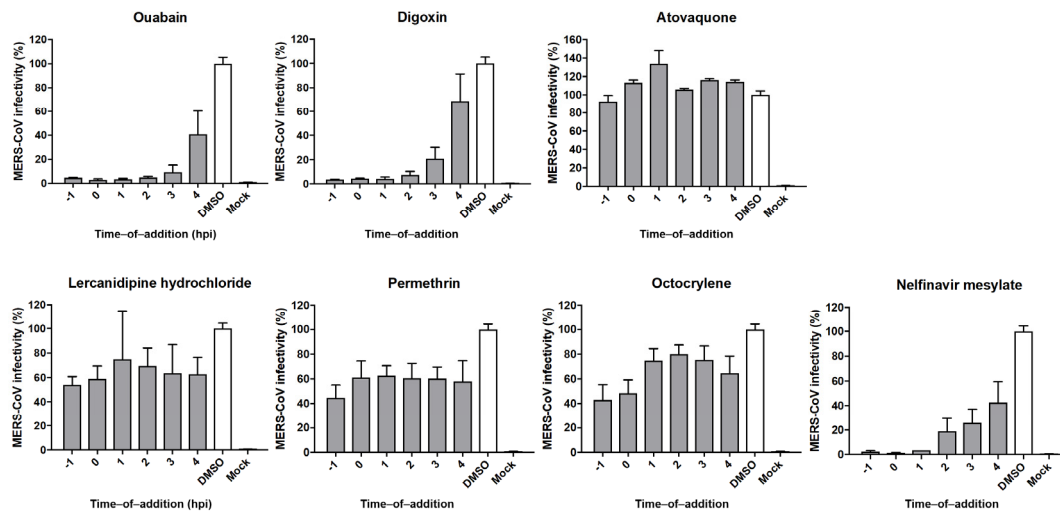

**Figure S2.** Time-of-addition study with additional FDA-approved drugs. Seven FDA-approved drugs not shown in Figure. 2 were analyzed by time-of-addition experiments. Vero cells were infected with MERS-CoV at a multiplicity of infection of 5, and drugs were administered at six-time points pre- or post-infection as indicated. Drugs were used at concentrations above their 90% inhibitory concentration (IC<sub>90</sub>) values.

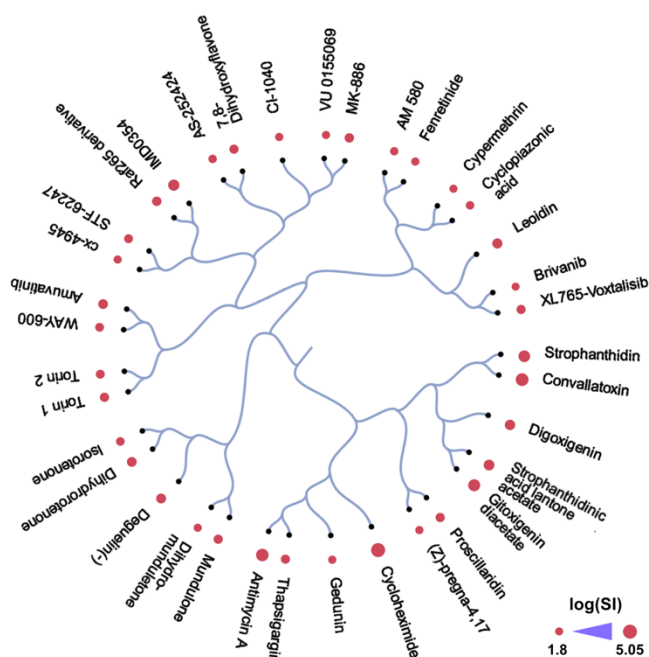

**Figure S3.** Structural relationship between inhibitors. Dendrogram showing the structural relationship of 36 selected inhibitors with anti-MERS-CoV activity. Compounds were clustered based on their structural similarity calculated by ECPF4 fingerprints and the Tanimoto coefficient [36]. The activity of the compounds was quantified using the log SI values and shown as bubbles. Bubble size corresponds to compounds' log TI and SI (<https://cspade.fimm.fi/>).

**Table S1.** Inhibitors identified by HCS with SI >6.

| Inhibitor Name        | IC <sub>50</sub> <sup>1</sup> | CC <sub>50</sub> <sup>2</sup> | SI <sup>3</sup> |
|-----------------------|-------------------------------|-------------------------------|-----------------|
| Cycloheximide         | 0.16                          | >25                           | >156.3          |
| Convallatoxin         | 0.31                          | >25                           | >80.6           |
| Gitoxigenin diacetate | 0.48                          | >25                           | >52.1           |
| Antimycin A           | 0.36                          | >25                           | >69.4           |
| Strophanthidin        | 0.56                          | >25                           | >44.6           |
| IMD0354               | 0.25                          | 8.74                          | 35.0            |
| Digoxigenin           | 1.13                          | >25                           | >22.1           |
| Leoidin               | 1.26                          | >25                           | >19.8           |
| Deguelin(-)           | 1.47                          | >25                           | >17.0           |
| Dihydrorotenone       | 1.52                          | >25                           | >16.4           |
| Amuvatinib (MP-470)   | 1.60                          | >25                           | >15.6           |
| Raf265 derivative     | 1.86                          | >25                           | >13.4           |
| MK-886                | 1.91                          | >25                           | >13.1           |
| Proscillaridin        | 2.05                          | >25                           | >12.1           |
| Torin 1               | 2.08                          | >25                           | >12.0           |
| Mundulone             | 1.21                          | 14.58                         | 12.0            |
| 7,8-Dihydroxyflavone  | 2.11                          | >25                           | >11.8           |
| Voxtalisib (XL765)    | 2.17                          | >25                           | >11.5           |
| Thapsigargin          | 0.49                          | 5.55                          | 11.3            |
| Torin 2               | 2.44                          | >25                           | >10.2           |
| STF-62247             | 2.54                          | >25                           | >9.8            |
| WAY-600               | 2.58                          | >25                           | >9.7            |
| Isorotenone           | 2.90                          | >25                           | >8.6            |

|                         |      |       |      |
|-------------------------|------|-------|------|
| Cyclopiazonic acid      | 3.17 | >25   | >7.9 |
| AS-252424               | 1.78 | 14.14 | 7.9  |
| AM 580                  | 3.32 | >25   | >7.5 |
| CI-1040                 | 3.50 | >25   | >7.1 |
| Fenretinide             | 2.80 | 19.85 | 7.1  |
| Gedunin                 | 3.59 | >25   | >7.0 |
| Silmitasertib (cx-4945) | 3.66 | >25   | >6.8 |
| VU 0155069              | 3.69 | >25   | >6.8 |
| Dihydro-munduletone     | 3.72 | >25   | >6.7 |
| Cypermethrin            | 3.77 | >25   | >6.6 |
| Guggulsterone           | 3.85 | >25   | >6.5 |
| Brivanib (BMS-540215)   | 4.13 | >25   | >6.1 |

<sup>1</sup> 50% inhibitory concentration (IC<sub>50</sub>); <sup>2</sup> 50% cytotoxicity concentration (CC<sub>50</sub>);

<sup>3</sup> Selectivity Index (SI): ratio of CC<sub>50</sub>/IC<sub>50</sub>.
